1 **Involvement of birth weight and body composition on autonomic recovery following**  
2 **aerobic exercise in children: A prospective, observational and analytical study**

3 *Short title:* **Involvement of birth weight and body composition on autonomic recovery**  
4 **following exercise**

5  
6 Juliana Edwiges Martinez Spada<sup>1</sup>, Fernando R. Oliveira<sup>2</sup>, David M. Garner<sup>1,3</sup>, Vitor E. Valenti<sup>1\*</sup>

7  
8 <sup>1</sup> Post-Graduate Program in Physical Therapy, UNESP, Presidente Prudente, SP, Brazil.

9  
10 <sup>2</sup> School of Public Health, University of Sao Paulo, Sao Paulo, SP, Brazil.

11  
12 <sup>3</sup> Cardiorespiratory Research Group, Department of Biological and Medical Sciences, Faculty of  
13 Health and Life Sciences, Oxford Brookes University, Headington, Gypsy Lane, Oxford, OX3  
14 0BP, United Kingdom.

15  
16 **\*Corresponding author:** Vitor E. Valenti

17 Av. Hygino Muzzi Filho, 737. Bairro: Mirante  
18 17.525-900 - Marília, SP

19 Phone: +55 (14) 3402-1300

20 E-mail: [vitor.valenti@unesp.br](mailto:vitor.valenti@unesp.br)

21

22

23 **ABSTRACT**

24 Birth weight (BW) can be used to assess the health status of the newborn. However, its impacts  
25 on later in life regarding heart rate (HR) variability (HRV) is not totally clear. We aimed to  
26 analyze the involvement of BW and body composition on HRV recovery following aerobic  
27 exercise in children. The study was conducted in healthy children 9 to 11 years of age (40  
28 females and 27 males) divided into two groups: G1 (BW < 3400 grams, N = 33) and G2 (BW >  
29 3400 grams, N = 34). The volunteers completed an experimental protocol of submaximal aerobic  
30 exercise on a treadmill and remained seated for 30 minutes after exercise. Systolic (SAP) and  
31 diastolic arterial pressure (DAP), respiratory rate (f) and HRV were analyzed before and during  
32 recovery from exercise. SAP and f were significantly decreased 30 minutes after exercise  
33 compared to 1 minute after exercise in G1 and G2. Mean HR, high frequency band of spectral  
34 analysis (HF) , root mean square of successive interbeat intervals difference, SD1 index and  
35 mean length were diminished 0 to 5 minutes after exercise compared to rest in G2 while  
36 maximum length increased 0 to 5 minutes after exercise compared to resting in G2. Linear  
37 regression revealed association of fat percentage and BW with nonlinear HRV recovery. In  
38 conclusion, autonomic recovery after exercise was somewhat delayed in children with high BW.  
39 BW and fat percentage *slightly* influence HRV recovery.

40

41 **Keywords:** Autonomic Nervous System; Birth weight; Children; Exercise; Heart Rate.

42

43

44

45

## 46 INTRODUCTION

47 The cardiovascular system is regulated through the autonomic nervous system (ANS). Its  
48 sympathetic and parasympathetic components sustain the organism within its homeostatic  
49 patterns [1]. The ANS regulates the respiratory, thermoregulatory and vasomotor systems,  
50 baroreceptors and endocrine metabolism (renin-angiotensin-aldosterone) [2]. Activation of the  
51 sympathetic nervous system elevates heart rate (HR), increases cardiac contractility, reduces  
52 venous compliance and induces vasoconstriction, whilst parasympathetic modulation lessens HR  
53 through vagal impulses [3].

54 The autonomic responses of HR during aerobic exercise are considered by vagal  
55 withdrawal in the first few seconds that elevate HR [4]. Afterwards, an increase in sympathetic  
56 activity increases cardiac contraction and accelerates wave ventricular depolarization  
57 conduction<sup>2</sup>. In contrast, non-elevation of HR in the initial phase of exercise may be indicative of  
58 a deficiency of vagal activity [3]. Vagal re-entrance and sympathetic withdrawal contribute to the  
59 return of HR levels attained at the start of exercise [4].

60 HR variability (HRV) evaluates interbeat oscillations [5,6] and can be noninvasively  
61 investigated through the analysis of RR intervals in physiological or pathological conditions,  
62 providing evidence regarding the influence of ANS [7,8] on the sinus node through linear and  
63 non-linear methods in the time and frequency domains by application of nonlinear analysis  
64 through complexity techniques or algorithms [9].

65 Autonomic recovery following exercise corresponds to the rate of HR decline owing to  
66 reactivation and coordinated vagal withdrawal following exercise [10-12]. Examination of  
67 autonomic recovery after aerobic exercise indicates appropriate clinical data regarding autonomic  
68 imbalance and is correlated to a reduction of vagal tone or exaggerated sympathetic activation

69 [13,14]. Prior studies evaluating the autonomic recovery after exercise demonstrated that HR  
70 recovery after exercise is influenced by features related to the anthropometric variables and  
71 exercise characteristics [15-18].

72 Birth weight (BW) is an interesting and important anthropometric variable that merits  
73 attention. Battaglia and Lubchenco [19] developed an intrauterine growth chart for the  
74 classification of BW at gestational age. Furthermore, previous studies have revealed that adult  
75 individuals with low BW had autonomic dysfunction at rest, characterized by increased  
76 sympathetic activity and lessened parasympathetic activity [20-21]. Still, different outcomes  
77 regarding the relationship between low BW and autonomic dysfunction have demonstrated  
78 ambiguous and inconclusive results [22].

79 A previous study investigated 5 to 12 year-old children during sleep and, it was observed  
80 that the association between low BW and prematurity was connected to cardiac structure  
81 alterations; yet, it was unable to modify the autonomic control [23]. In a sample of 397 children,  
82 the parasympathetic modulation at rest was reduced in adults with low BW, and those with higher  
83 BW had greater parasympathetic and baroreflex activity, indicating that autonomic control can be  
84 modified in adults born with low BW [24].

85 Taken together, it leads us to hypothesize that children with higher BW would achieve  
86 faster autonomic recovery following exercise.

87 It should be highlighted that there are physiological and maturational idiosyncrasies  
88 between boys and girls of the same age that are evident in the pubertal period [25]. Nevertheless,  
89 Goto *et al.* [26] was unable to find modifications between the genders. Similarly, Guilkey *et al.*  
90 [27] found no discrepancies in HRV between boys and girls 9 to 11 years old after maximal and  
91 submaximal exercise. Of late, Souza *et al.* [22] reported no significant changes in HRV between

92 boys and girls aged 5 to 14 years old. In this study, we decided to perform the investigation of  
93 data considering boys and girls in the same group.

94 After an extensive the literature review, we discovered no studies that evaluated the impact  
95 of BW on HRV during recovery from exercise in children with a restricted age (9 to 11 years).  
96 Bearing in mind that the hemodynamic response to exercise may provide evidence that is unable  
97 to be detected at rest [18]; we draw attention to the relevance of a study that emphasizes children  
98 who do not apparently present cardiorespiratory diseases. This would assist the identification of  
99 possible predispositions to pathological conditions. So, we investigated the involvement of BW  
100 and body composition on autonomic recovery after aerobic exercise in children.

101

## 102 **METHODS**

### 103 ***STROBE Guidelines***

104 This investigation conforms to the STROBE (STrengthening the Reporting of  
105 OBservational studies in Epidemiology) guidelines. Our study contains details of the study  
106 design, participants, setting, measurement, variables, description of potential sources of bias, data  
107 sources, quantitative variables description, and statistical methods.

### 108 ***Population study and Eligibility Criteria***

109 This study was performed in 67 healthy term-born (BW > 2500 grams, gestational age > 39  
110 weeks) children between 9 and 11 years old split into two groups according to the BW (3400  
111 grams): G1 (BW < 3400 grams, 15 boys and 18 girls) and G2 (BW > 3400 grams, 12 boys and 22  
112 girls). We chosed 3400 grams because it was the median of the entire group.

113 The prenatal evidence from the mother's report was confirmed with her medical records.  
114 Family medical histories were attained using a questionnaire completed. We excluded children

115 with impairments that circumvented the correct performance of the procedures (cardiovascular,  
116 renal, respiratory, endocrine, orthopedic and neurological disorders), those under  
117 pharmacological treatments that influence the ANS, or girls who had started their menstrual  
118 cycle.

### 119 ***Ethical approval and informed consent***

120 All study protocols were approved by the Research Ethics Committee in Research of  
121 UNESP/Marilia (CAAE – 75760117.4.0000.5406) and a statement explicitly stated that the  
122 methods were undertaken in accordance with the 466/2012 resolution of the National Health  
123 Council of 12/12/2012. Informed consent was attained from all children's parents that signed a  
124 confidential consent letter.

### 125 ***Study design and Setting***

126 This is a prospective, observational and analytical sectional study performed at the  
127 Autonomic Nervous System Study Center at UNESP/Marilia, SP, Brazil.

### 128 ***Bias***

129 The introductory examination was completed to evaluate the eligibility criteria and to  
130 obtain descriptive statistical characterizations about the individuals. An anamnesis was made to  
131 confirm the absence of recognized diseases and treatment with medications. The descriptive  
132 profile of the subjects was defined to characterize the sample, reduce the unpredictability of the  
133 variables, improving reproducibility and physiological interpretation. Before the start of the  
134 experimental procedures, subjects were documented according to age, mass (kg), height (m),  
135 systolic (mmHg) and diastolic arterial pressure (mmHg), waist (WC), hip (HC) and abdominal  
136 (AC) circumferences, waist-to-hip ratio and body mass index (BMI).

137 The protocol was undertaken individually between 1:00 pm and 6:00 pm to standardize  
138 circadian influences on HRV [27]. It was also performed in a soundproofed room with controlled  
139 temperature between 22 °C and 25 °C and humidity amid 50% and 60% at the School of  
140 technical courses in informatics - Igeeks<sup>®</sup> (Tupis, 236, 17.600-000, Tupã, SP, Brazil).

141 The children were told to avoid drinking beverages containing stimulants or caffeinated  
142 drinks for 24 hours prior to the evaluation, food 8 hours before the assessment. They were  
143 instructed not to perform strenuous exercises for 24 hours before appraisal. Appropriate and  
144 comfortable clothing should be worn to undergo the necessary physical exertions.

#### 145 ***Initial assessment and Experimental Protocols***

146 In the initial assessment the researcher logged: age, gender, weight, height, gestational age,  
147 BW, systolic (SAP) and diastolic arterial pressure (DAP), HR and respiratory rate (f) and whether  
148 their parents presented with cardiovascular disease.

149 WC, HC and AC were attained in orthostatism, with the abdomen relaxed and arms  
150 extended along the body, being measured with a tape measure positioned in the area of lesser  
151 curvature located between the final rib and the iliac crest. Waist-stature (WSR) and waist-hip  
152 ratio (WHR) were considered. BMI was attained according to the recommendations described by  
153 Lohman *et al.* [28]. Body adiposity index (BAI) [29] and conicity index (CI) [30] were gained  
154 through anthropometric data, and the body fat percentage (BF%) was estimated via bioimpedance  
155 [31,32].

156 HR was recorded with the Polar RS800cx HR monitor (Polar Electro, Finland) and  
157 respiratory rate (f) was enumerated by counting the respiratory cycles during one minute whilst  
158 the volunteer was uninformed about the procedure taking place. Thus, avoiding influences and  
159 consequent changes in the subjects' f.

160 SAP and DAP were measured indirectly by auscultation using a calibrated aneroid  
161 sphygmomanometer and stethoscope (Premium, Barueri, São Paulo, Brazil) on the left arm whilst  
162 the individual continued seated and breathing spontaneously.

163 To avoid measurement distortions, the same researcher measured the same parameters  
164 throughout the whole experiment.

165 After the preliminary evaluation, the HR monitor was located on the subjects' thorax, at the  
166 level of the distal third of the sternum. Before recording HR, SAP and DAP were measured.

167 The children remained at rest for 15 minutes in the seated position under spontaneous  
168 breathing, followed by 5 initial minutes walking on a treadmill for physical 'warming up' (50-  
169 55% of maximal HR (HR<sub>max</sub>) HR:  $208 - 0.7 \times \text{age}$ ) [34], next 25 minutes with 60-65% without  
170 inclination, and increments of 0.5 km/h every minute until reaching submaximal HR.

171 Directly after the exercise, subjects underwent one minute standing and then subsequently  
172 seated for passive recovery for a further 29 continuous minutes, totaling 30 minutes of recovery.  
173 During recovery from exercise volunteers remained seated in silence with spontaneous breathing,  
174 they did not sleep, did not perform any movements that would induce autonomic changes and did  
175 not ingest any type of drink or food.

176 HR, f, SAP and DAP were logged at 15 minutes of rest and at 1 and 30 minutes during  
177 recovery from exercise. HRV analysis was achieved at the following times: Rest (10<sup>th</sup> to 15<sup>th</sup>  
178 minute of resting) and during recovery: 0 to 5<sup>th</sup> minute, 5<sup>th</sup> to 10<sup>th</sup> minute, 10<sup>th</sup> to 15<sup>th</sup> minute, 15<sup>th</sup>  
179 to 20<sup>th</sup> minute, 20<sup>th</sup> to 25<sup>th</sup> minute and 25<sup>th</sup> to 30<sup>th</sup> minute [35].

180

181

182



183 *Variables, Data Sources and Outcome Measures*

184 *HRV analysis*

185 RR intervals were recorded by the cardiac portable monitor. The datasets were transferred  
186 to the Polar Pro Trainer program (v.3.0, Polar Electro, Finland). Digital filtering followed by  
187 manual filtering was accomplished for the disposal of artifacts. For data analysis, RR intervals  
188 were selected for analysis and extracted into a ‘txt’ file. All indices were evaluated using a fixed  
189 number of 256 consecutive stable RR intervals obtained from the baseline ending as well as the  
190 final 256 intervals of each recovery period. Only series with greater than 95% of sinus beats were  
191 included in the study.

192 HRV analysis followed directives from the Task Force<sup>36</sup> and have been previously  
193 published [37,38]. Kubios HRV<sup>®</sup> software (Kubios<sup>®</sup> HRV v.1.1 for Windows, Biomedical Signal  
194 Analysis Group, Department of Applied Physics, University of Kuopio, Finland) was necessary  
195 to calculate linear indices.

196 The time domain index was analyzed via the rMSSD indices (square root of the mean of  
197 the square of the differences between adjacent normal RR intervals in a time interval) expressed  
198 in milliseconds (ms) and SD1 (instantaneous variability of beat-to-beating). For the frequency  
199 domain analysis, the high frequency spectral component (HF) calculated through the Fast Fourier  
200 Transform was used in absolute units (ms<sup>2</sup>) [39].

201 The symbolic analysis of HRV was completed through the distribution of the series of RR  
202 intervals at the levels: 0V and 2ULV through CardioSeries v2.4<sup>®</sup> software (Ribeirao Preto, SP,  
203 Brazil). Detailed information concerning symbolic analysis has been described previously [40].

204 The recurrence analysis of HRV was achieved quantitatively using the Recurrence Plot  
205 (RP) through the Visual Recurrence Analysis<sup>®</sup> software to investigate the following indices:

206 mean length (L Mean), recurrence rate (REC), determinism (DET), laminarity (LAM), Shannon  
207 Entropy (Shannon Shannon Entropy, SE) and maximum length (L Max).

### 208 *Study Size*

209 The sample size was computed using a pilot test, wherein the online software provided by  
210 the website [www.lee.dante.br](http://www.lee.dante.br) was necessary taking into consideration the RMSSD index as a  
211 variable. The significant difference in magnitude assumed was 14.11 ms, with a standard  
212 deviation of 12.8 ms, per alpha risk of 5% and beta of 80%. The sample size designated a  
213 minimum of 13 individuals per group.

### 214 *Statistical analysis*

215 Data was presented as descriptive statistics to characterize the sample and were designated  
216 by the statistical values of mean, standard deviation and 95% confidence intervals.

217 Data normality was assessed via the Shapiro-Wilk test. The unpaired Student t test  
218 (parametric) or the Mann-Whitney test (non-parametric) were obligatory to compare descriptive  
219 characteristics between the groups.

220 For comparison between the moments (rest vs. recovery from exercise), the repeated  
221 measurements one-way analysis of variance (ANOVA1) test followed by Dunnett's test  
222 (parametric distribution) or the Friedman test followed by Dunn's test (non-parametric  
223 distribution) were required. The two-way repeated measures analysis of variance technique  
224 (ANOVA2) was performed to analyze any differences between groups (birth weight) vs. time  
225 (recovery time points). The data of the repeated measurements were checked for sphericity  
226 violation using the Mauchly test and the Greenhouse-Geisser correction was applied when the  
227 sphericity was violated.

228 Significant differences were considered statistically significant when the p-value was lower  
229 than 0.05 (or <5%). The statistical analysis were performed with Minitab software (Minitab, PA,  
230 USA) and GraphPad InStat - v3.06 (GraphPad Software, Inc., San Diego California USA).

231 Effect size was calculated through Cohen's *d*. Large effect size was considered for values >  
232 0.9 and medium effect size for values between 0.9 and 0.5 [41].

233 We performed correlation of HRV with BW, body adiposity index, fat percentage through  
234 Spearman correlation coefficient. We considered high correlation for  $r > 0.75$  and moderate  
235 correlation for  $r$  between 0.75 and 0.5. We applied simple linear regression models to model 0V,  
236 Recurrent, Determinism - DET (%), Percent Laminarity and Shannon Shannon Entropy  
237 parameters as dependent variables and fat percentage and BW as independent variables. As a  
238 result of the non-normality of Shannon Shannon Entropy to fit the regression model through the  
239 cubic method prior to the analysis Determinism - DET and Percent Laminarity it was not possible  
240 to complete the transformation to normality, so the stated parameters were excluded from the  
241 regression analysis.

242

## 243 **RESULTS**

244 We acknowledged that 28% of children's parents in G1 exhibited cardiovascular  
245 impairment and 21% in G2 reported cardiovascular disease.

246 According to Table 1, children in the G2 had a higher gestational age, BW and height  
247 ( $p < 0.05$ ) whilst children in the G1 group had elevated body adiposity index and fat percentage  
248 (Table 1).

249 SAP was significantly reduced 1 minute (Cohen's *d*: 0.03) and 30 minutes (Cohen's *d*:  
250 1.05, large effect size) after exercise compared to rest in G1. In G2 SAP was also decreased 1

251 minute (Cohen's  $d$ : 0.39, large effect size) and 30 minutes (Cohen's  $d$ : 1.04, large effect size)  
252 following exercise. We also recognized that  $f$  declined 1 minute (Cohen's  $d$ : 0.23, small effect  
253 size) and 30 minutes after exercise (Cohen's  $d$ : 1.22, large effect size) in G1. In accordance,  $f$  was  
254 decreased 1 minute (Cohen's  $d$ : 0.14, small effect size) and 30 minutes after exercise (Cohen's  $d$ :  
255 0.97, large effect size) in G2. Then again, no significant changes were observed in DAP (Figure  
256 1).

257 Figure 2 reveals HR, RR interval, HF and RMSSD deviate during recovery from exercise.  
258 HR was increased 0-5 minutes after exercise compared to rest in G2 (Cohen's  $d$ : 1.52, large  
259 effect size). RR interval declined 0-5 minutes compared to rest in G1 (Cohen's  $d$ : 0.7, medium  
260 effect size) and G2 (Cohen's  $d$ : 1.56, large effect size). HF was reduced 0-5 minutes following  
261 exercise compared to rest in G2 (Cohens'  $d$ : 1.16, large effect size) and RMSSD was also reduced  
262 0-5 minutes following exercise compared to rest in G2 (Cohens'  $d$ : 1.36, large effect size).

263 In relation to symbolic HRV analysis, 0V increased 0-5 minutes after exercise compared to  
264 rest in G1 (Cohens'  $d$ : 1.01, large effect size) and G2 (Cohens'  $d$ : 1.31, large effect size), 2UV was  
265 decreased 0-5 minutes after exercise in G1 (Cohens'  $d$ : 1.31, large effect size) and G2 (Cohens'  $d$ :  
266 0.9, large effect size) (Figure 3).

267 Quantitative analysis of the Poincaré plot through SD1 index disclosed that it decreased 0-5  
268 minutes after exercise compared to rest in G2 (Cohen's  $d$ : 1.36, large effect size) (Figure 3).

269 Recurrence analysis was presented in Figure 4. Mean length was reduced 0-5 minutes after  
270 exercise compared to rest in G2 (Cohen's  $d$ : 1.73, large effect size). Maximum length increased  
271 0-5 minutes following exercise compared to rest (Cohen's  $d$ : 1.57, large effect size) in G2.  
272 Recurrence rate increased 0-5 minutes after exercise compared to rest in G1 (Cohen's  $d$ : 0.99,  
273 large effect size) and G2 (Cohen's  $d$ : 0.99, large effect size). Determinism increased 0-5 minutes

274 after exercise in G1 (Cohen's  $d$ : 0.71, medium effect size) and G2 (Cohen's  $d$ : 0.5, medium effect  
275 size). Laminarity increased 0-5 minutes after exercise compared to rest in G1 (Cohen's  $d$ : 0.72,  
276 medium effect size) and G2 (Cohen's  $d$ : 0.91, large effect size). Shannon Entropy enlarged 0-5  
277 minutes after exercise compared to rest in G1 (Cohen's  $d$ : 0.94, large effect size) and G2  
278 (Cohen's  $d$ : 0.76, medium effect size).

279 Table 2 illustrates correlation between HRV and anthropometric variables. We documented  
280 weak correlation of fat percentage with 0V 0-5 minutes during recovery from exercise and  
281 recurrence rate 0-5 minutes during recovery from exercise. There was also weak correlation of  
282 BW with Determinism 5-10 minutes during recovery from exercise, Laminarity 5-10 minutes  
283 during recovery from exercise and Shannon Entropy 5-10 minutes during recovery from exercise  
284 (Table 2).

285 Linear regression established significant association between recurrence 0-5 minutes during  
286 recovery from exercise and fat percentage and between Shannon Shannon Entropy 5-10 minutes  
287 during recovery from exercise and BW (Table 3).

288

## 289 **DISCUSSION**

290 Childhood obesity can begin at any age, it occurs in a comparable way as in adults and is  
291 considered a global public health problem [42]. The etiology of obesity is multifactorial because  
292 it encompasses environmental, behavioral, organic, psychosocial and socioeconomic situations  
293 [43]. Thus, autonomic control of HR during physical effort is influenced by anthropometric  
294 factors by reason of the body composition and concentration of visceral fat deposits, which are  
295 strongly associated with cardiovascular diseases [44,45]. An earlier study indicated the possible  
296 impact of BW on ANS [19]. Yet, it is unclear if BW has significant impact in children during

297 recovery from aerobic exercise, which is an important method to identify such autonomic  
298 changes [13].

299 In this way, our study was started to evaluate the involvement of BW and body  
300 composition on autonomic and cardiovascular recovery after submaximal aerobic exercise in  
301 children. As principal discoveries, we reported that: 1)  $f$ , SAP and DAP recovery were similar  
302 between children with higher and lower BW; 2) parasympathetic control of HR through linear  
303 HRV analysis was slightly delayed in children with higher BW; 3) nonlinear analysis of HRV  
304 indicated slower return following exercise in children with higher BW; 4) fat percentage and BW  
305 *slightly* influenced HRV recovery. It is imperative to mention that children with lower BW had  
306 increased fat percentage and body adiposity index.

307 The experimental conventions of this study were founded on HRV analysis during recovery  
308 from exercise. This procedure is often performed to detect cardiovascular diseases [14]. When  
309 related to acute submaximal aerobic physical exercise, it offers hemodynamic dysfunction that is  
310 occasionally unidentified at rest [13].

311 Based on our findings, SAP and  $f$  did not return to rest baseline levels 30 minutes after  
312 exercise. No significant changes in DAP were observed between before and during recovery from  
313 exercise. After physical exercise, SAP decreases due to peripheral vasodilatation [46], but,  
314 insufficient SAP decline may be indicative of cardiovascular disease and mortality [47]. Also,  
315 DAP normally remains stable during exercise [46]; and stimuli from the cerebral cortex effect a  
316 sudden increase in HR and  $f$  to the level that satisfies the requirements for metabolic gas  
317 exchange where, at the end of the exercise, they return to their baseline values [46].

318 We revealed that linear HRV analysis through power spectral density and time domain  
319 analysis demonstrated delayed return of HF band and RMSSD to rest values in children with

320 higher BW. It designates that vagal control of HR offered slower return after exercise. This  
321 information is supported by previous studies [20-22,27] that had already evaluated the impact of  
322 BW on autonomic cardiac function. It was recognized that both low and high BW may be related  
323 to high risk of developing cardiovascular disease in both childhood and adulthood [48]. It was  
324 revealed that very low BW would be associated with immature autonomic activity [49], and that  
325 these individuals could exhibit reduced parasympathetic activity when attaining adulthood [21].  
326 Nevertheless, the results remain inconclusive.

327 A previous study evaluated HR in 100 children aged 5-14 years old and demonstrated that  
328 there was a decrease in parasympathetic modulation in children with low BW, suggesting higher  
329 risk of developing cardiovascular and metabolic diseases during life in children with low BW.  
330 The aforesaid study strengthened the possibility that vagal withdrawal, rather than an increased  
331 sympathetic activity, may precede cardiovascular diseases in children with low BW [22].

332 Another study evaluated the ANS in 46 young adults aged 18-25 years old who consented  
333 to the handgrip test and it was observed that adults with low BW demonstrated an exaggerated  
334 increase in sympathetic response. The stated results support the hypothesis that adult subjects  
335 with low BW have adjustments in the autonomic modulation of HR [50].

336 In addition to linear HRV analysis, we performed nonlinear analysis. This is for the reason  
337 that the ANS is considered a complex, dynamic and non-linear system, since it is susceptible to  
338 numerous organic and environmental activities [51]. Symbolic and recurrence analysis of HRV  
339 are unlike the traditional linear analysis because it constructs the parameters based on nonlinear  
340 RR interval distribution [40].

341 Symbolic analysis of HRV exhibited that 0V and 2UV HRV parameters during recovery  
342 from exercise were similar in both groups. Previous studies involving pharmacological blockade

343 and autonomic tests [52] indicated that the 0V% index epitomizes the cardiac sympathetic  
344 modulation and the 2ULV% index is related to cardiac vagal modulation.

345 Equally, recurrence HRV analysis evidenced that mean length was significantly decreased  
346 and maximum length was significantly increased 5 minutes after exercise in children with higher  
347 BW, whilst no significant change was recognized in the group with lower BW for those  
348 parameters. Recurrence rate, determinism, laminarity and Shannon Entropy were significantly  
349 increased 5 minutes after exercise compared to rest in both groups. The recurrence analysis is  
350 able to detect physiological changes [51] and non-stationary structural changes [53]. The lower  
351 the recurrence parameters values, the greater the chaotic response and more complexity in the  
352 system [51]. Our results propose that nonlinear HRV recovery from submaximal effort is delayed  
353 in children with higher BW.

354 Taken together, the research literature indicates that premature children and adults have  
355 greater likelihoods of developing cardiac autonomic dysfunction throughout life [22,50]. In  
356 contrast, our study evaluated term-born healthy children and separated them according to BW.  
357 With this in mind, we propose that higher BW may not have beneficial influences on the ANS.

358 We similarly examined the impact of body composition on the ANS. There was no  
359 significant change between higher and lower BW groups in relation to WC, abdominal  
360 circumference, WSR, WHR, BMI and conicity index. Nonetheless, we reported increased fat  
361 percentage and body adiposity index in children with reduced BW. This evidence raises the  
362 question: Which variable has greater influence on HRV recovery following exercise: BW, fat  
363 percentage or body adiposity index?

364 In order to resolve this question, we performed correlation and linear regression analysis. It  
365 was demonstrated that BW and current fat percentage has slight association with HRV recovery



366 following exercise. Adjusted  $R^2$  revealed higher association of BW with nonlinear HRV recovery  
367 (BW:  $R^2=0.084$ ). In this way, we propose that BW has higher interaction with autonomic HR  
368 recovery.

369 Some points are worth highlighting from our study. Children of either gender between 9  
370 and 11 years old were considered in this study. The children were not separated by gender  
371 because all children had homogeneous (pre-pubertal) maturational states. Guilkey *et al.* [27]  
372 evaluated the effects of autonomic modulation of the HR in children of the same age group and  
373 concluded that vagal activation during recovery from physical exercise was analogous amongst  
374 both boys and girls.

375 We evaluated healthy term-born children, henceforth, these results cannot be applied to  
376 populations with different ages and/or health status. We recognized that 21% of parents of  
377 children with lower BW and 28% of the parents of children with higher BW presented with  
378 cardiovascular disease. The research literature offered strong evidence regarding the influence of  
379 family history on risk factor for cardiovascular disease [54]. Yet, the groups were consistent  
380 regarding this variable.

381

## 382 **CONCLUSION**

383 Term-born children with higher BW presented delayed autonomic recovery following  
384 aerobic submaximal exercise. BW and current fat percentage has impact on autonomic recovery  
385 from exercise. Our results draw attention to newborns with extreme high BW, since these  
386 outcomes provide important evidence that increased BW may be related to possible autonomic  
387 dysfunction and cardiovascular disorders in older ages. So, we highlight the importance of early  
388 detection of autonomic impairment before progression to the possible cardiovascular disorders.

389 **ACKNOWLEDGEMENTS**

390 The authors would like to thank the IGeeks computer school, Prof. Anne Michelli Gomes  
391 and Prof. Letícia Santana de Oliveira for their technical assistance. The study received financial  
392 support from FAPESP (Number 2016/02994-1) and CNPq (Number 301079/2015-3).

393

394 **CONFLICT OF INTEREST**

395 The authors declare no conflict of interest.

396

397 **AUTHOR CONTRIBUTIONS**

398 Juliana Edwiges Martinez Spada collected data, performed conduction of experiments,  
399 performed statistical analysis and draft the manuscript.

400 Fernando R. Oliveira performed conduction of experiments, statistical analysis and draft  
401 the manuscript.

402 David M. Garner reviewed statistical analysis, extensively reviewed the manuscript,  
403 English Grammar and Spelling.

404 Vitor E. Valenti supervised the study, wrote discussion section and gave final approval for  
405 the version submitted for publication.

406 All authors reviewed and approved the final version of the manuscript.

407

408

409

410

411

412 **REFERENCES**

- 413
- 414 1. Musch, T.I., Haidet, G.C., Ordway, G.A., Longhurst, J.C., Mitchell, J.H. Training effects  
415 on regional blood flow response to maximal exercise in foxhounds. *J Appl Physiol.* **62**,  
416 1724-32 (1987).
- 417 2. Laughlin, M.H., Roseguini, B. Mechanisms for exercise training-induced increases in  
418 skeletal muscle blood flow capacity: differences with interval sprint training versus  
419 aerobic endurance training. *J Physiol Pharmacol.* **59**, 71-88 (2008).
- 420 3. Aubert, A.E., Seps, B., Beckers, F. Heart rate variability in athletes. *Sports Med.* **33**, 889-  
421 919 (2003).
- 422 4. Arai, Y., Saul, J.P., Albrecht, P., Hartley, L.H., Lilly, L.S., Cohen, R.J., Colucci, W.S.  
423 Modulation of cardiac autonomic activity during and immediately after exercise. *Am J*  
424 *Physiol.* **256**, H132-41 (1989).
- 425 5. Novais, L.D., Sakabe, D.I., Takahashi, A.C.M., et al. Avaliação da variabilidade da  
426 frequência cardíaca em repouso de homens saudáveis sedentários e de hipertensos e  
427 coronariopatas em treinamento físico. *Rev Bras Fisioter.* **8**, 207-13 (2004).
- 428 6. Brunetto, A.F., Silva, B.M., Roseguini, B.T., Hirai, D.M., Guedes, D.P. Limiar  
429 ventilatório e variabilidade da frequência cardíaca em adolescentes. *Rev Bras Med*  
430 *Esporte.* **11**, 22-27 (2005).
- 431 7. Carnethon, M.R., Liao, D., Evans, G.W., Cascio, W.E., Chambless, L.E., Heiss, G.  
432 Correlates of the shift in heart rate variability with an active postural change in a healthy  
433 population sample: The Atherosclerosis Risk In Communities study. *Am Heart J.* **143**,  
434 808-13 (2002).

- 435 8. Aires, M.M. *Fisiologia*. 3<sup>a</sup> ed. Rio de Janeiro: Guanabara Koogan; (2008).
- 436 9. Carniel, E.F., Zanolli, M.L., Antônio, M.A., Morcillo, A.M. Determinants for low birth  
437 weight according to Live Born Certificates. *Rev Bras Epidemiol*. **11**, 169-79 (2008).
- 438 10. Vanderlei, L.C.M., Silva, R.A., Pastre, C.M., Azevedo, F.M., Godoy, M.F. Comparison  
439 of the Polar S810i monitor and the ECG for the analysis of heart rate variability in the  
440 time and frequency domains. *Braz J Med Biol Res*. **41**, 854-9 (2008).
- 441 11. Baynard, T., Pitetti, K.H., Guerra, M., Fernhall, B. Heart rate variability at rest and during  
442 exercise in persons with Down syndrome. *Arch Phys Med Rehabil*. **85**, 1285-90 (2004).
- 443 12. Sacha, J., Barabach, S., Statkiewicz-Barabach, G., et al. How to strengthen or weaken the  
444 HRV dependence on heart rate description of the method and its perspectives. *Int J*  
445 *Cardiol*. **168**, 1660-3 (2013).
- 446 13. Imai, K., Sato, H., Hori, M., et al. Vagally mediated heart rate recovery after exercise is  
447 accelerated in athletes but blunted in patients with chronic heart failure. *J Am Coll*  
448 *Cardiol*, **24**, 1529–35 (1994).
- 449 14. Peçanha, T. Heart rate recovery: autonomic determinants, methods of assessment and  
450 association with mortality and cardiovascular diseases. *Clin Physiol Funct Imaging*. **34**,  
451 327-39 (2014).
- 452 15. Porta, A., Guzzetti, S., Montano, N., Furlan, R., Pagani, M., Malliani, A., Cerutti, S.  
453 Shannon Entropy, Shannon Entropy rate, and pattern classification as tools to typify  
454 complexity in short heart period variability series. *IEEE Trans Biomed Eng*. **48**, 1282-91  
455 (2001).
- 456 16. Paschoal, M.A., Volanti, V.M., Pires, C.S., Fernandes, F.C. Heart rate variability in  
457 different age groups. *Rev Bras Fisioter*. **10**, 413-9 (2006).

- 458 17. Machado, F.A., Denadai, B.S. Validade das equações preditivas da frequência cardíaca  
459 máxima para crianças e adolescentes. *Arq Bras Cardiol.* **97**, 136-40 (2011).
- 460 18. Moreno, I.L. Efeitos da hidratação sobre a modulação autonômica. 146f. Dissertação  
461 (Mestrado em Fisioterapia) – Universidade Estadual Paulista Júlio de Mesquita Filho,  
462 Presidente Prudente (2010).
- 463 19. Battaglia, F.C., Lubchenco, L.O. A practical classification of newborn infants by weight  
464 and gestational age. *J Pediatr.* **71**, 159-63 (1967).
- 465 20. Weitz, G., Bonnemeier, H., Süfke, S., Wellhöner, P., Lehnert, H., Dodt, C. Heart rate  
466 variability and metabolic rate in healthy young adults with low birth weight. *Am J*  
467 *Cardiovasc Dis.* **3**, 239-46 (2013).
- 468 21. Jones, A., Beda, A., Ward, A.M., Osmond, C., Phillips, D.I., Moore, V.M., Simpson,  
469 D.M. Size at birth and autonomic function during psychological stress. *Hypertension.* **49**,  
470 548-55 (2007).
- 471 22. Souza, L.V., Oliveira, V., De Meneck, F., Grotti Clemente, A.P., Strufaldi, M.W., Franco,  
472 M.D. Birth Weight and Its Relationship with the Cardiac Autonomic Balance in Healthy  
473 Children. *PLoS One.* **12**, e0167328 (2017).
- 474 23. Yiallourou, S.R., Wallace, E.M., Whatley, C., et al. Sleep: A Window Into Autonomic  
475 Control in Children Born Preterm and Growth Restricted. *Sleep.* **40**, (2017).
- 476 24. Mathewson, K.J., Van Lieshout, R.J., Saigal, S., Morrison, K.M., Boyle, M.H., Schmidt,  
477 L.A. Autonomic Functioning in Young Adults Born at Extremely Low Birth Weight.  
478 *Glob Pediatr Health.* **2**, 2333794X15589560 (2015).

- 479 25. Barbosa, K.B.F., Franceschini, S.C.C., Priore, S.E. Influência dos estágios de maturação  
480 sexual no estado nutricional, antropometria e composição corporal de adolescentes. *Rev*  
481 *Bras Saude Mater Infant.* **6**, 375-382 (2006).
- 482 26. Goto, M., Nagashima, M., Baba, R., Nagano, Y., Yokota, M., Nishibata, K., Tsuji, A.  
483 Analysis of heart rate variability demonstrates effects of development on vagal  
484 modulation of heart rate in healthy children. *J Pediatr.* **130**, 725-9 (1997).
- 485 27. Guilkey, J.P., Overstreet, M., Mahon, A.D. Heart rate recovery and parasympathetic  
486 modulation in boys and girls following maximal and submaximal exercise. *Eur J Appl*  
487 *Physiol* **115**, 2125-33 (2015).
- 488 28. Jensen, M.A., Garde, A.H., Kristiansen, J., Nabe-Nielsen, K., Hansen, Å.M. The effect of  
489 the number of consecutive night shifts on diurnal rhythms in cortisol, melatonin and heart  
490 rate variability (HRV): a systematic review of field studies. *Int Arch Occup Environ*  
491 *Health.* **89**, 531-45 (2016).
- 492 29. Lohman, T.G, Roche AF, Martorell R. Anthropometric Standardization Reference  
493 Manual. Champaign: Human Kinetics Books, (1988).
- 494 30. Bergman, R.N., Stefanovski, D., Buchanan, T.A., et al. A Better Index of Body Adiposity.  
495 *Obesity* **19**, 1083-1089 (2011).
- 496 31. Valdez, R. A simple model-based index of abdominal adiposity. *J Clin Epidemiol.* **44**,  
497 955-6 (1991).
- 498 32. National Institute of Health Technology Assessment Conference Statement. Bioelectrical  
499 Impedance Analyses in Body Composition Measurement. *Nutrition*, **12**, 1-35 (1994).
- 500 33. Heyward, V.H., Stolarczyk LM. Avaliação da composição corporal. São Paulo: Manole,  
501 (2000).

- 502 34. Machado, F.A., Denadai, B.S.. Validity of predictive equations of maximum heart rate for  
503 children and adolescents. *Arq Bras Cardiol.* **97**, 136-40 (2011).
- 504 35. Gomes, R.L., Gonzaga, L.A., Vanderlei, L.C., Valenti, V.E. The effects of musical  
505 auditory stimulation on cardiorespiratory variables after aerobic exercise. *Science Sports.*  
506 Epub ahead of print (2018).
- 507 36. Camm, A.J., Malik, M., Bigger, J.T., Breithadt, G., et al. Heart rate variability: standards  
508 of measurement, physiological interpretation and clinical use. Task Force of the European  
509 Society of Cardiology and the North American Society of Pacing and Electrophysiology.  
510 *Circulation*, **93**, 1043-65 (1996).
- 511 37. Martiniano, E.C., Santana, M.D.R., Barros, E.L.D., do Socorro da Silva, M., Garner,  
512 D.M., de Abreu, L.C., Valenti, V.E. Musical auditory stimulus acutely influences heart  
513 rate dynamic responses to medication in subjects with well-controlled hypertension. *Sci*  
514 *Rep.* **8**, 958 (2018).
- 515 38. Gonzaga, L.A., Vanderlei, L.C.M., Gomes, R.L., Valenti, V.E. Caffeine affects autonomic  
516 control of heart rate and blood pressure recovery after aerobic exercise in young adults: a  
517 crossover study. *Sci Rep.* **7**, 14091 (2017).
- 518 39. Vanderlei, L.C.M., Pastre, C.M., Hoshi, R.A., Carvalho, T.D., Godoy, M.F. Basics of  
519 heart rate variability and its clinical applicability. *Rev Bras Cir Cardiovasc.* **24**, 205–17  
520 (2009).
- 521 40. Porta, A., Guzzetti, S., Montano, N., Furlan, R., Pagani, M., Malliani, A., Cerutti, S.  
522 Shannon Entropy, Shannon Entropy rate, and pattern classification as tools to typify  
523 complexity in short heart period variability series. *IEEE Trans Biomed Eng.* **48**, 1282-91  
524 (2001).

- 525 41. Quintana, D.S. Statistical considerations for reporting and planning heart rate variability  
526 case-control studies. *Psychophysiology*. **54**, 344-349 (2017).
- 527 42. Luiz, A.M.A.G., Gorayeb, R., Júnior, R.R.L., Domingos, N.A.M.. Depression, anxiety  
528 and social competence in obese children. *Estudos de Psicologia*. **10**, 35-39 (2005).
- 529 43. Giugliano, R., Carneiro, E.C. Factors associated with obesity in schoolchildren. *J*  
530 *Pediatrics*. **17**, 17-22 (2004).
- 531 44. Lins, T.C.B., Valente, L.M., Sobral Filho, D.C., Barbosa e Silva, O. Relation between  
532 heart rate recovery after exercise testing and body mass index. *Rev Port Cardiol*. **34**, 27-  
533 33 (2015).
- 534 45. Iacobellis, G., Willens, H.J. Echocardiographic epicardial fat: a review of research and  
535 clinical applications. *J Am Soc Echocardiogr*. **22**, 1311-9 (2009).
- 536 46. McArdle William, D., Katch Frank, I., Katch Victor, L. Exercise physiology: energy,  
537 nutrition and human performance. 7. ed. Rio de Janeiro: Guanabara Koogan, 2011.
- 538 47. Huang, C.L., Su, T.C., Chen, W.J., et al. Usefulness of paradoxical systolic blood pressure  
539 increase after exercise as a predictor of cardiovascular mortality. *Am J Cardiol*. **102**, 18-  
540 523 (2008).
- 541 48. Oldroyd, J., Renzaho, A., Skouteris, H. Low and high birth weight as risk factors for  
542 obesity among 4 to 5-year-old Australian children: does gender matter? *Eur J Pediatr*.  
543 **170**, 899-906 (2011).
- 544 49. Rakow, A., Katz-Salamon, M., Ericson, M., Edner, A., Vanpée, M. Decreased heart rate  
545 variability in children born with low birth weight. *Pediatr Res*. **74**, 339-43 (2013).



- 546 50. Chifamba, J., Mbangani, B., Chimhete, C., BWaunza, L., Allen, L.A., Chinyanga, H.M.  
547 Vasomotor sympathetic outflow in the muscle metaboreflex in low birth weight young  
548 adults. *Integr Blood Press Control.* **27**, 8:37-42 (2015).
- 549 51. Webber, C.L. Jr, Zbilut, J.P. Dynamical assessment of physiological systems and states  
550 using recurrence plot strategies. *J Appl Physiol (1985).* **76**, 965-73 (1994).
- 551 52. Silva, L.E.V., Geraldini, V.R., de Oliveira, B.P., Silva, C.A.A., Porta, A., Fazan, R.  
552 Comparison between spectral analysis and symbolic dynamics for heart rate variability  
553 analysis in the rat. *Sci Rep.* **7**, 8428 (2017).
- 554 53. Eckmann, J.P., Kamphorst, S.O., Ruelle, D.. Recurrence Plots of Dynamical Systems.  
555 *Europhys Lett.* **4**, 973-7 (1987).
- 556 54. Haybar, H., Jalali, M.T., Zayeri, Z.D. What Genetics Tells us about Cardiovascular  
557 Disease in Diabetic Patients? *Cardiovasc Hematol Disord Drug Targets.* **18**, 147-152  
558 (2018).
- 559  
560  
561  
562  
563  
564  
565  
566  
567  
568

569 **Table 1:** Descriptive statistics of age, gestational age, weight, birth weight, height, waist (WC),  
 570 hip (HC) and abdominal (AC) circumference, waist-hip circumference, waist-stature  
 571 circumference, body mass index, conicity index, body adiposity index and fat percentage.

| <b>Variables</b>                          | <b>G1</b>                    | <b>G2</b>                   | <b>P</b>     | <b>Cohen</b> |
|-------------------------------------------|------------------------------|-----------------------------|--------------|--------------|
| <b>Age (years)</b>                        | 9.62±0.70<br>[9.37-9.88]     | 9.72±0.62<br>[9.50-9.94]    | 0.57         | -            |
| <b>Gestational age (weeks)</b>            | 37.90±1.71<br>[37.2-38.5]    | 39.48±0.93<br>[39.1-38.8]   | < 0.0001**** | 0.1          |
| <b>Weight (Kg)</b>                        | 39.84±8.87<br>[36.6-43.0]    | 39.16±7.69<br>[36.4-41.8]   | 0.59         | -            |
| <b>Birth weight (Kg)</b>                  | 2.88±0.34<br>[2.76-3.00]     | 3.74±0.39<br>[3.60-3.88]    | < 0.0001**** | 2.3          |
| <b>Height (m)</b>                         | 1.39±0.06<br>[1.37-1.42]     | 1.43±0.08<br>[1.40-1.46]    | <0.05*       | 0.5          |
| <b>Waist circumference (cm)</b>           | 67.8±9.56<br>[64.3-71.2]     | 65.6±8.95<br>[62.4-68.8]    | 0.33         | -            |
| <b>Waist-hip ratio (cm)</b>               | 81.31±7.57<br>[78.58-84.04]  | 79.51±7.96<br>[76.68-82.34] | 0.35         | -            |
| <b>Abdominal circumference (cm)</b>       | 74.18±10.31<br>[70.47-77.90] | 69.51±9.48<br>[66.15-72.87] | 0.06         | -            |
| <b>Waist-stature ratio (cm)</b>           | 0.48±0.05<br>[0.46-0.50]     | 0.45±0.05<br>[0.43-0.47]    | 0.04         | 0.6          |
| <b>Waist-hip ratio (cm)</b>               | 0.83±0.04<br>[0.81-0.84]     | 0.83±0.13<br>[0.78-0.87]    | 0.09         | -            |
| <b>Body mass index (Kg/m<sup>2</sup>)</b> | 20.24±3.28<br>[19.05-21.42]  | 18.82±2.77<br>[17.83-19.81] | 0.06         | -            |
| <b>Conicity index</b>                     | 1.16±0.06<br>[1.14-1.19]     | 1.15±0.10<br>[1.12-1.19]    | 0.27         | -            |
| <b>Body adiposity index</b>               | 31.26±3.51                   | 28.25±4.92                  | 0.01**       | 0.7          |

|                           |               |               |        |     |
|---------------------------|---------------|---------------|--------|-----|
|                           | [29.99-32.53] | [26.51-30.00] |        |     |
| <b>Fat percentage (%)</b> | 25.81±7.60    | 20.27±9.03    |        |     |
|                           | [22.81-28.82] | [16.77-23-78] | 0.01** | 0.6 |

---

572 Mean ± standard deviation [95% Confidence interval].

573 **Legend:** G1: birth weight < 3400 grams; G2: birth weight > 3400 grams; Kg: kilogram; m:

574 meters; cm: centimeters; %: percentage. \* p<0.05; \*\* p<0.01; \*\*\* p<0.001; \*\*\*\* p<0.0001.

575

576

577

578

579

580

581

582

583

584

585

586

587

588

589

590



|                        |        |       |               |               |              |               |        |       |        |       |        |       |        |       |
|------------------------|--------|-------|---------------|---------------|--------------|---------------|--------|-------|--------|-------|--------|-------|--------|-------|
| BW                     | 0.099  | 0.428 | 0.083         | 0.507         | 0.289        | 0.019         | 0.072  | 0.564 | 0.100  | 0.423 | 0.029  | 0.815 | -0.057 | 0.651 |
| Body adiposity index   | 0.217  | 0.081 | -0.148        | 0.238         | -0.085       | 0.500         | -0.000 | 0.994 | 0.030  | 0.030 | 0.007  | 0.953 | 0.133  | 0.289 |
| Fat percentage         | -0.082 | 0.551 | <b>-0.276</b> | <b>0.041*</b> | -0.094       | 0.494         | -0.055 | 0.685 | -0.231 | 0.089 | -0.042 | 0.755 | 0.185  | 0.174 |
| <b>Determinism</b>     |        |       |               |               |              |               |        |       |        |       |        |       |        |       |
| BW                     | 0.168  | 0.180 | 0.127         | 0.309         | <b>0.312</b> | <b>0.011*</b> | 0.147  | 0.241 | 0.209  | 0.094 | 0.106  | 0.398 | -0.029 | 0.816 |
| Body adiposity index   | 0.162  | 0.195 | -0.029        | 0.815         | -0.107       | 0.396         | -0.048 | 0.704 | -0.088 | 0.485 | -0.066 | 0.599 | 0.101  | 0.423 |
| Fat percentage         | -0.126 | 0.356 | -0.229        | 0.092         | -0.092       | 0.502         | -0.063 | 0.644 | -0.094 | 0.491 | -0.085 | 0.532 | 0.109  | 0.426 |
| <b>Laminarity</b>      |        |       |               |               |              |               |        |       |        |       |        |       |        |       |
| BW                     | 0.152  | 0.224 | 0.207         | 0.097         | <b>0.282</b> | <b>0.022*</b> | 0.121  | 0.337 | 0.145  | 0.247 | 0.108  | 0.387 | 0.023  | 0.855 |
| Body adiposity index   | 0.169  | 0.176 | -0.051        | 0.685         | -0.109       | 0.384         | -0.000 | 0.995 | 0.044  | 0.723 | -0.037 | 0.767 | 0.122  | 0.332 |
| Fat percentage         | -0.051 | 0.707 | -0.229        | 0.091         | -0.123       | 0.367         | -0.067 | 0.622 | -0.091 | 0.506 | -0.109 | 0.428 | 0.062  | 0.651 |
| <b>Shannon Entropy</b> |        |       |               |               |              |               |        |       |        |       |        |       |        |       |
| BW                     | 0.133  | 0.288 | 0.089         | 0.477         | <b>0.351</b> | <b>0.004*</b> | 0.081  | 0.518 | 0.165  | 0.186 | 0.062  | 0.618 | -0.100 | 0.425 |
| Body adiposity index   | 0.225  | 0.071 | -0.099        | 0.432         | -0.111       | 0.378         | 0.012  | 0.921 | -0.063 | 0.613 | -0.008 | 0.948 | 0.134  | 0.284 |
| Fat percentage         | -0.039 | 0.774 | -0.295        | 0.028         | -0.042       | 0.756         | -0.088 | 0.521 | -0.218 | 0.109 | 0.015  | 0.908 | 0.192  | 0.159 |
| <b>L Max</b>           |        |       |               |               |              |               |        |       |        |       |        |       |        |       |
| BW                     | 0.178  | 0.155 | 0.115         | 0.360         | 0.297        | 0.016         | 0.149  | 0.149 | 0.078  | 0.534 | 0.070  | 0.577 | -0.068 | 0.589 |
| Body adiposity index   | 0.039  | 0.755 | 0.066         | 0.596         | -0.042       | 0.736         | 0.014  | 0.906 | 0.207  | 0.097 | 0.009  | 0.941 | 0.166  | 0.185 |
| Fat percentage         | -0.161 | 0.238 | 0.003         | 0.978         | -0.113       | 0.408         | -0.183 | 0.180 | 0.020  | 0.881 | -0.129 | 0.347 | 0.012  | 0.926 |

593 **Legend:** BW: Gestational age. L Mean: Mean length; L Max: Maximum length.

594

595

596

597 **Table 3.** Linear regression between HRV and anthropometric variables.

598

| Models                             | $\beta$       | 95% C.I.                | p              | $R^2$        |
|------------------------------------|---------------|-------------------------|----------------|--------------|
| <b>1- 0V 0-5 min</b>               |               |                         |                |              |
| Fat percentage                     | -0.379        | -0.8121; 0.0533         | 0.084          | 0.095        |
| <b>2- Recurrence rate 0-5 min</b>  |               |                         |                |              |
| Fat percentage                     | <b>-0.201</b> | <b>-0.3920; -0.0103</b> | <b>0.039*</b>  | <b>0.077</b> |
| <b>5. Shannon Entropy 5-10 min</b> |               |                         |                |              |
| BW                                 | <b>0.010</b>  | <b>0.0017 ; 0.01906</b> | <b>0.019 *</b> | <b>0.084</b> |

603 **Legend:** BMI: body mass index; kg: kilogram; m: meters.

604

605

606

607

608

609

610

611

612

613

614

615

616

617

618

619

620 **FIGURE LEGENDS**

621 **Figure 1:** Mean values and respective standard deviations of SAP, DAP and f obtained at rest  
622 and during recovery from the submaximal aerobic exercise. \*\*\*G1: significant different in  
623 relation to rest in G1 ( $p<0.001$ ); \*\*\*G2: significant different in relation to rest in G2 ( $p<0.001$ );  
624 \*\*\*\*G1: significant different in relation to rest in G1 ( $p<0.0001$ ); mmHg: millimeters of  
625 mercury; cpm: cycles per minute; \*\*\*\*G2: significant different in relation to rest in G2  
626 ( $p<0.0001$ ); SAP: systolic arterial pressure; DAP: diastolic arterial pressure; f: respiratory rate;  
627 G1: children with birth weight < 3400 grams; G2: children with birth weight > 3400 grams.

628 **Figure 2:** Mean values and respective standard deviations of HR, RR intervals, RMSSD and HF  
629 obtained at rest and during recovery from the submaximal aerobic exercise. \*G1: significant  
630 different in relation to rest in G1 ( $p<0.05$ ); \*\*G2: significant different in relation to rest in G2  
631 ( $p<0.01$ ); \*\*\*G2: significant different in relation to rest in G2 ( $p<0.001$ ); RMSSD: root-mean  
632 square of differences between adjacent normal RR intervals); HF: high frequency; ms:  
633 milliseconds; bpm: beats per minute; G1: children with birth weight < 3400 grams; G2: children  
634 with birth weight > 3400 grams.

635 **Figure 3:** Mean values and respective standard deviations of SD1 and symbolic analysis obtained  
636 at rest and during recovery from the submaximal aerobic exercise. \*G1: significant different in  
637 relation to rest in G1 ( $p<0.05$ ); \*G2: significant different in relation to rest in G2 ( $p<0.05$ ); \*\*G1:  
638 significant different in relation to rest in G1 ( $p<0.01$ ); \*\*G2: significant different in relation to  
639 rest in G2 ( $p<0.01$ ); SD1: instantaneous recording of the variability of beat-to-beat ms:  
640 milliseconds; G1: children with birth weight < 3400 grams; G2: children with birth weight >  
641 3400 grams.

642 **Figure 4:** Mean values and respective standard deviations of recurrence analysis obtained at rest  
643 and during recovery from the submaximal aerobic exercise. \*G1: significant different in relation  
644 to rest in G1 ( $p < 0.05$ ); \*G1: significant different in relation to rest in G1 ( $p < 0.01$ ); \*\*\*G2:  
645 significant different in relation to rest in G2 ( $p < 0.001$ ); L MEAN: mean length; L MAX:  
646 maximum length; %: percentage; G1: children with birth weight  $< 3400$  grams; G2: children with  
647 birth weight  $> 3400$  grams.  
648



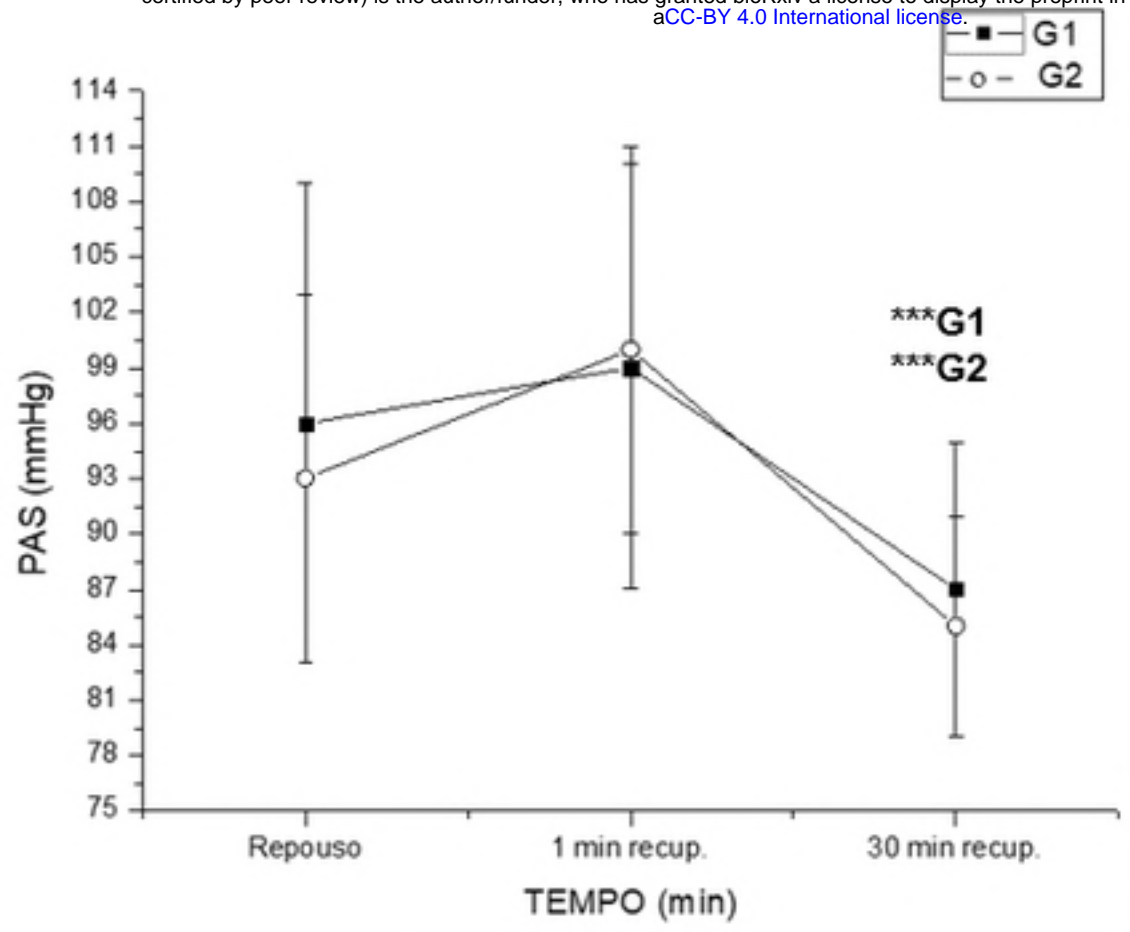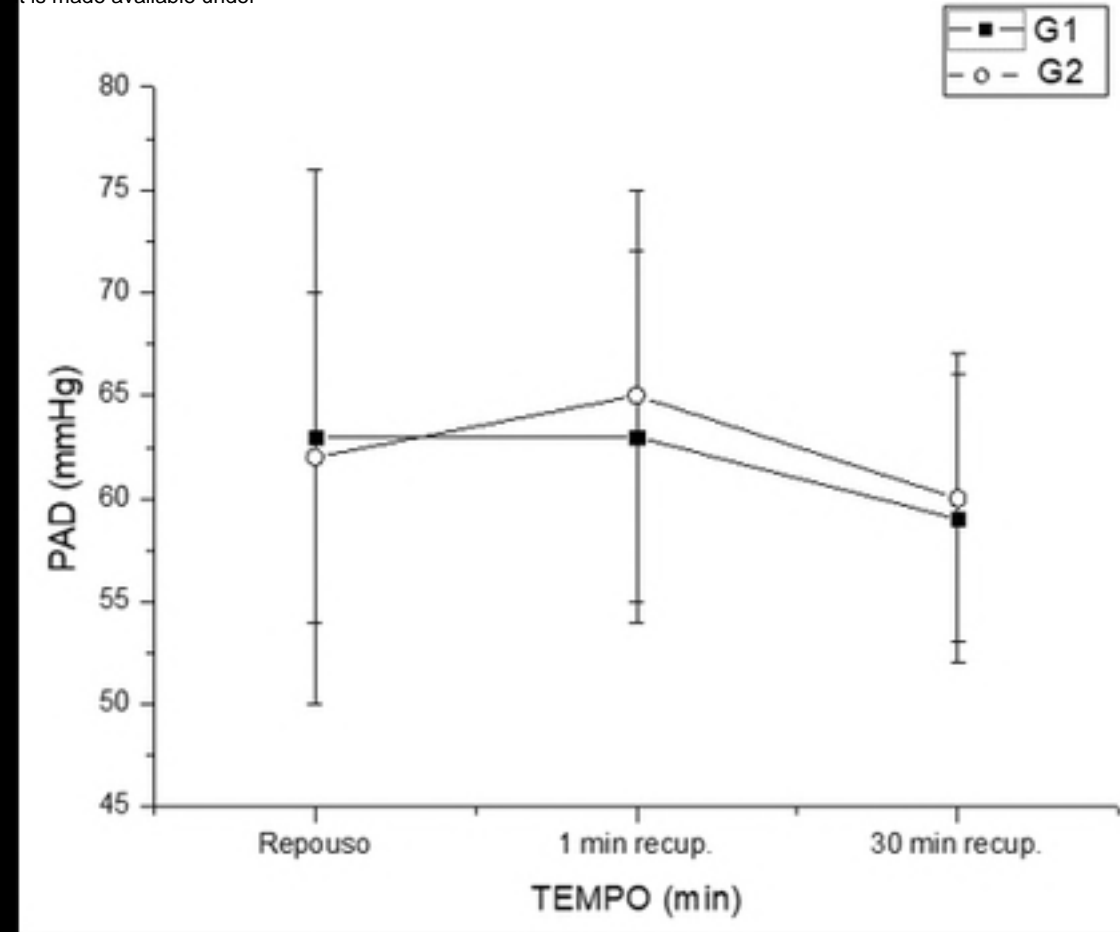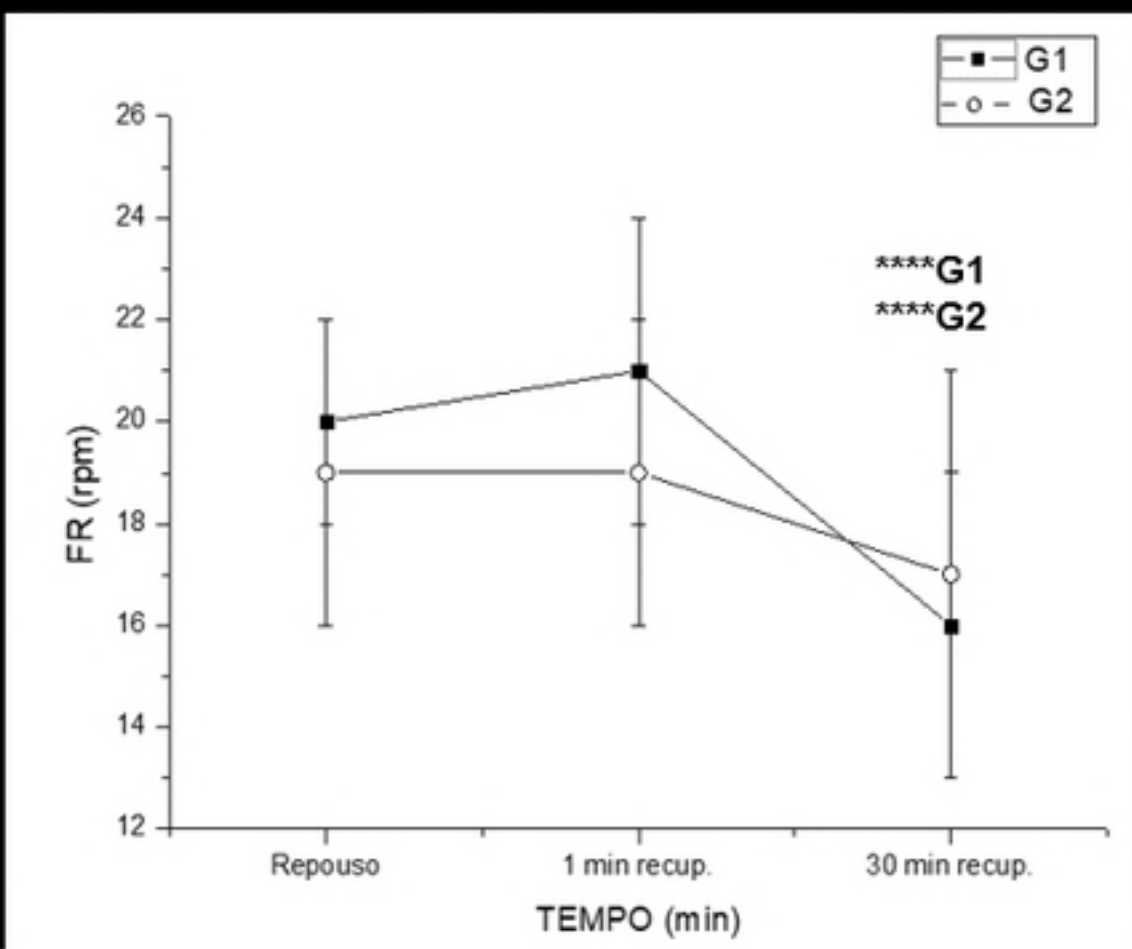

Figure 1

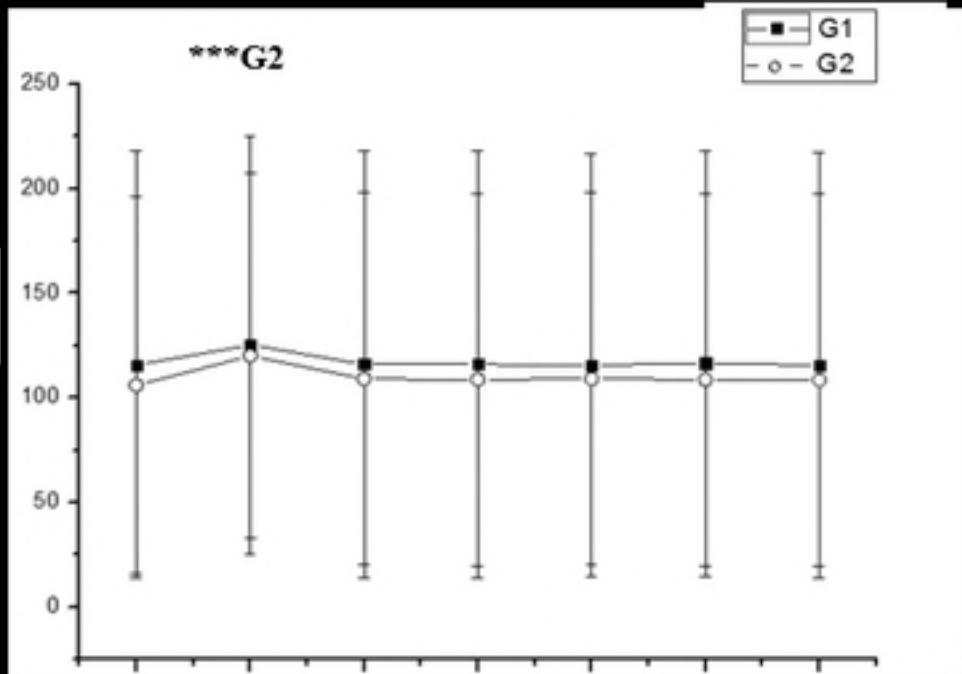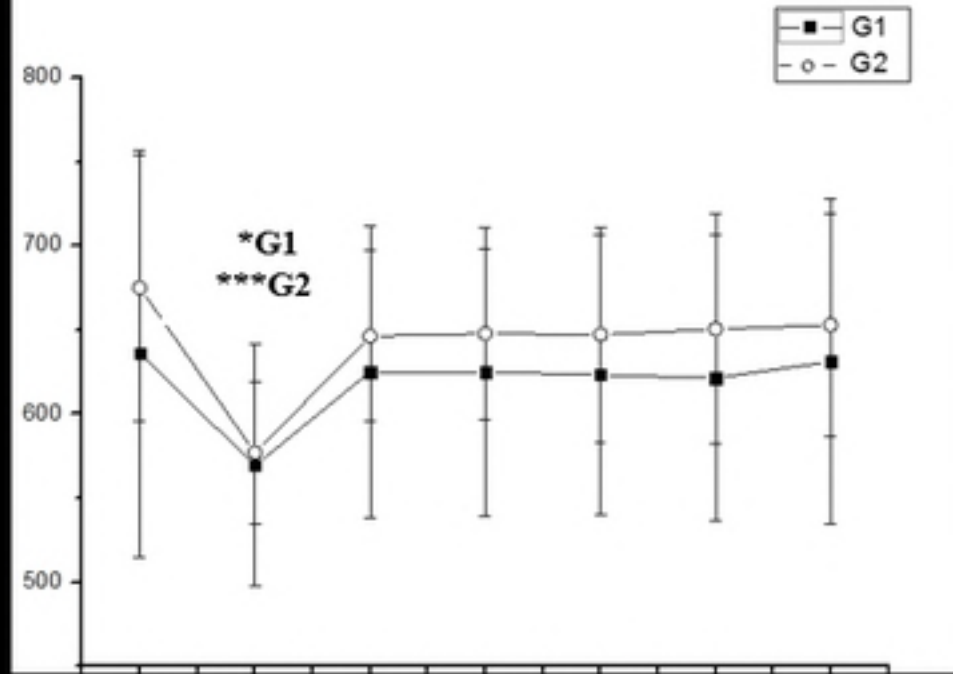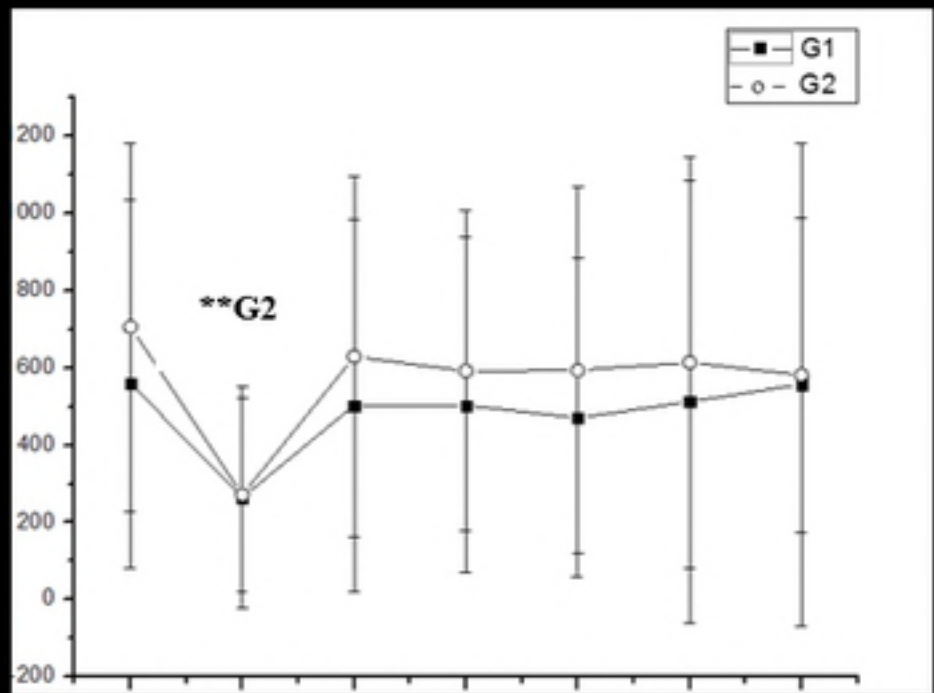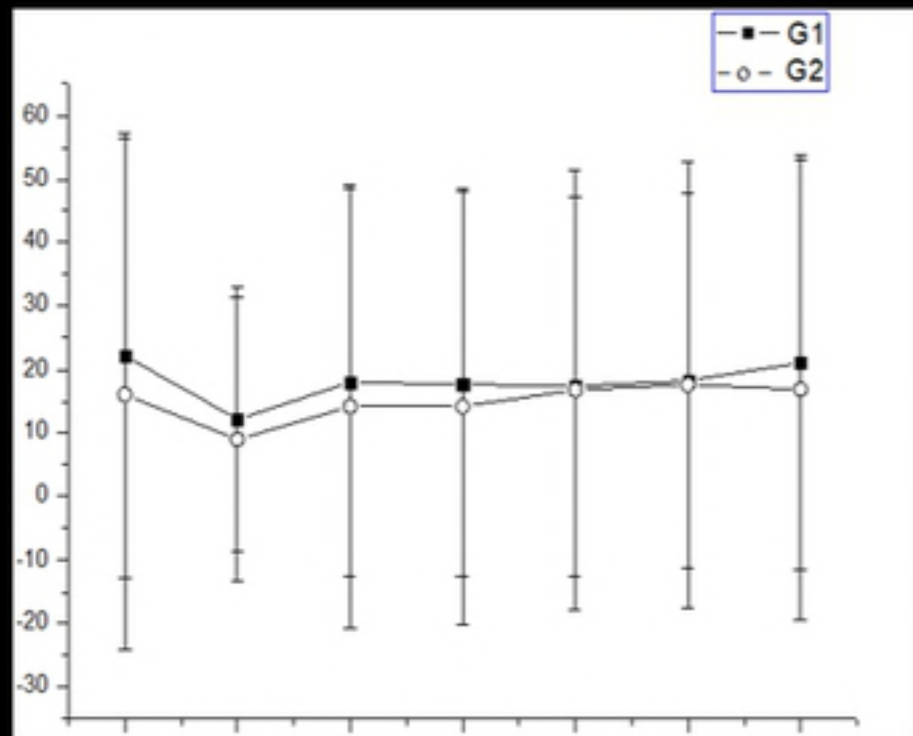

Figure 2

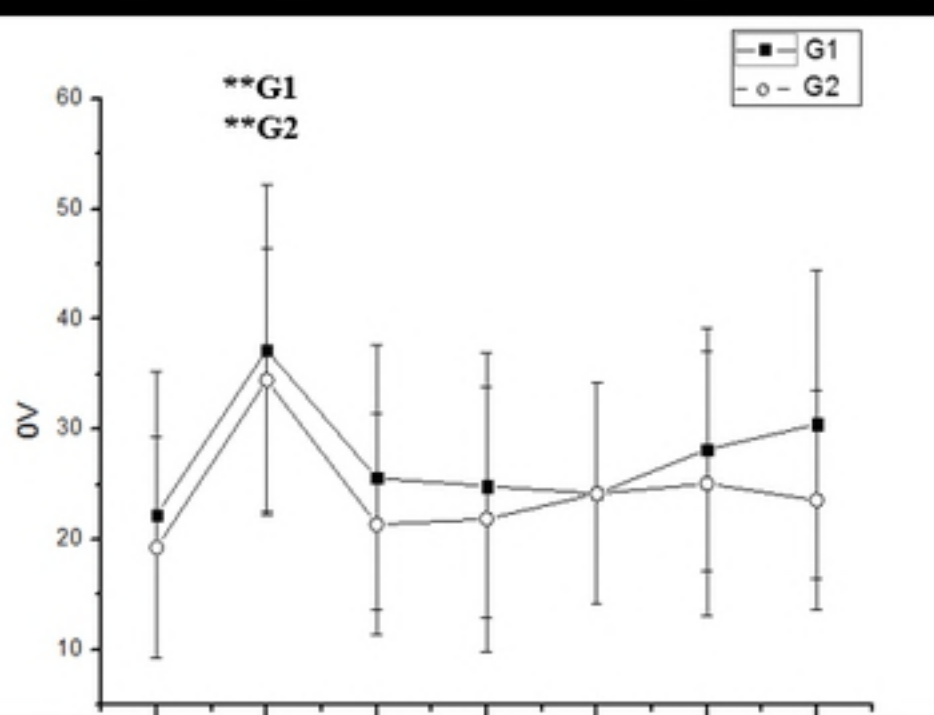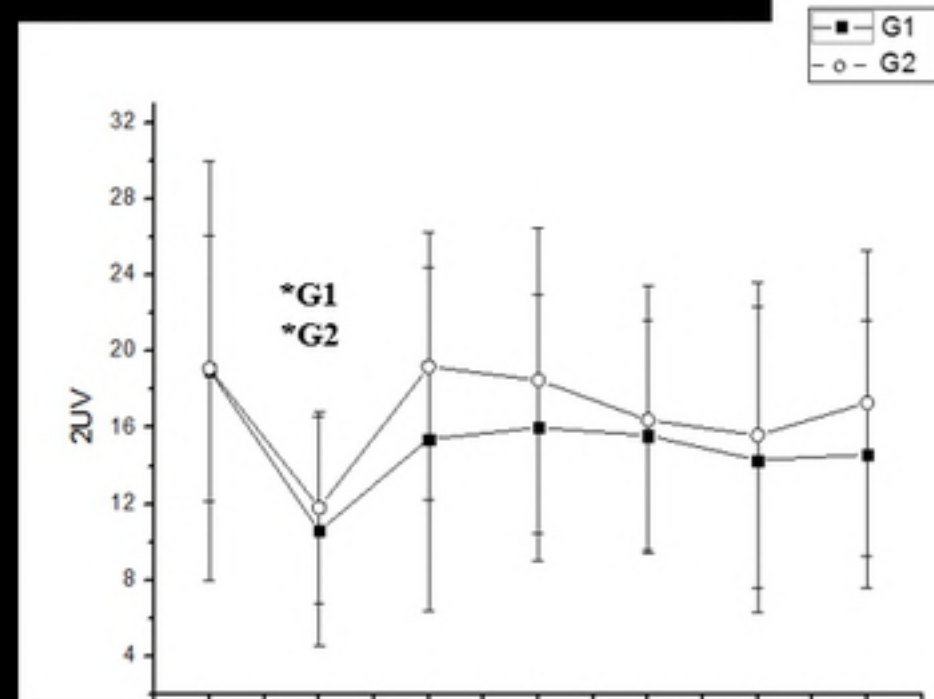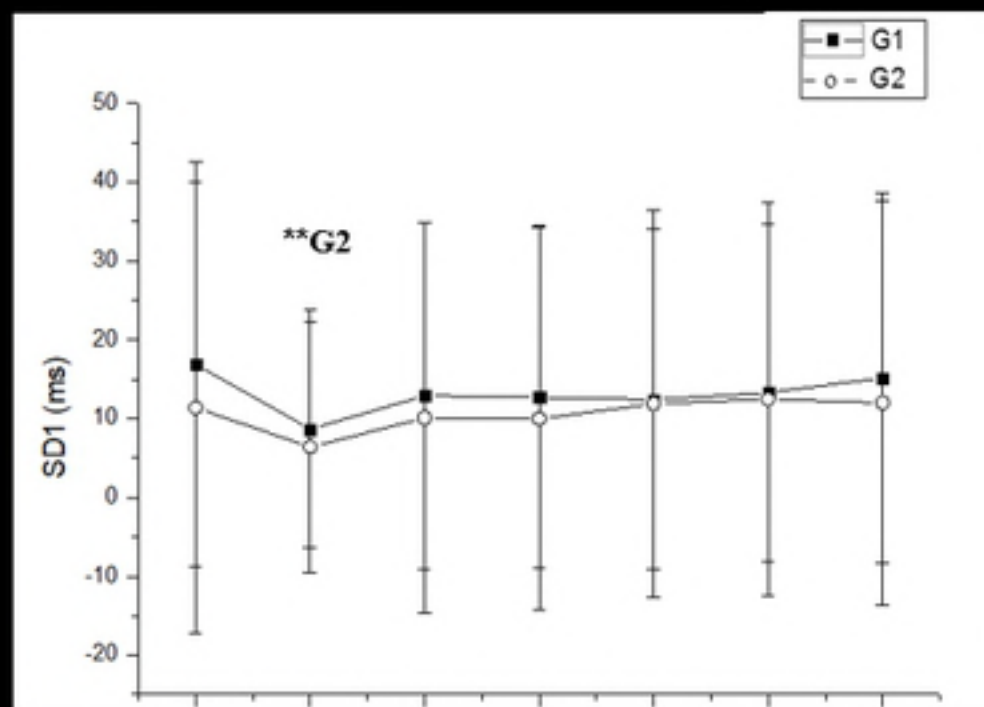

Figure 3

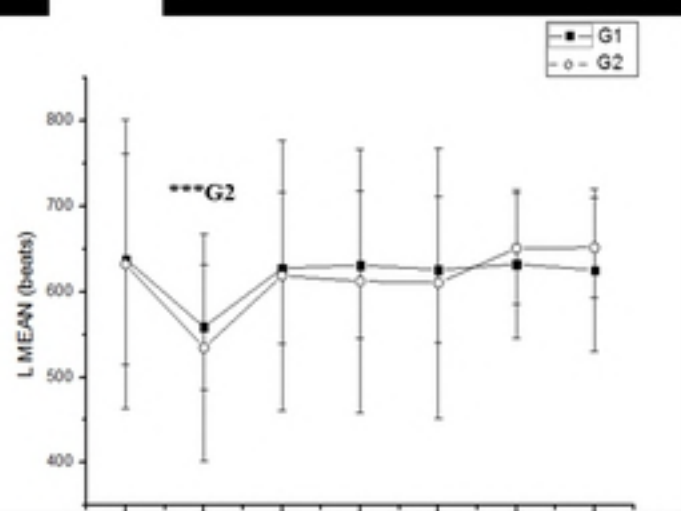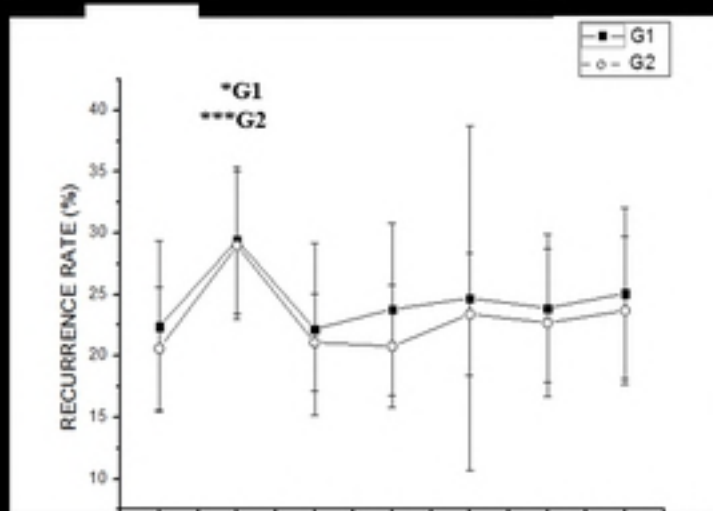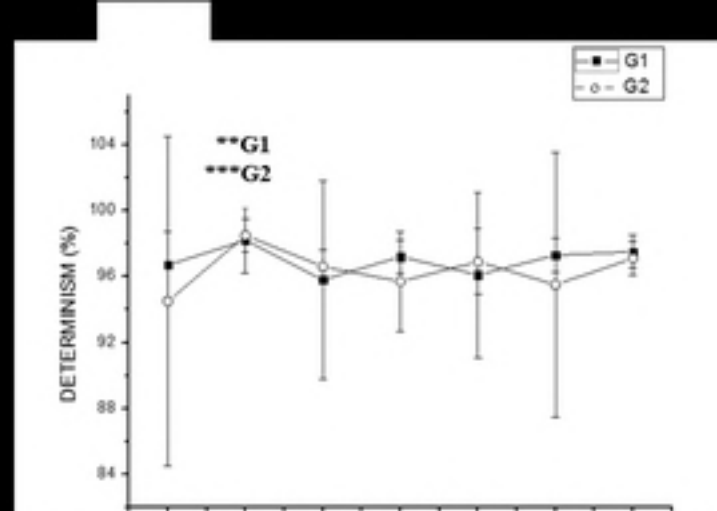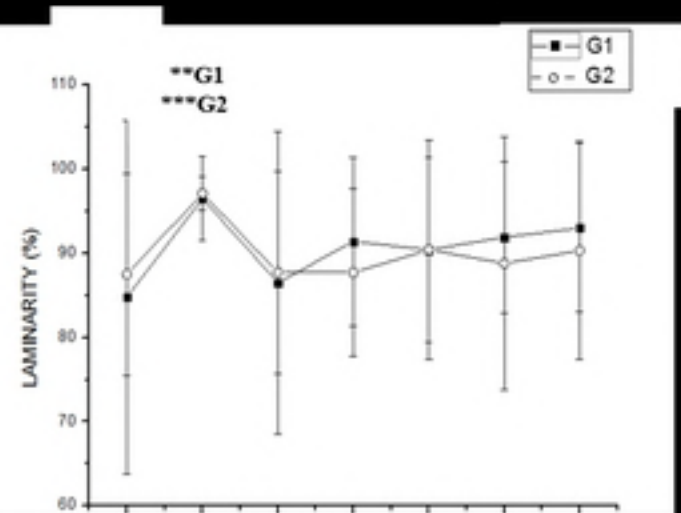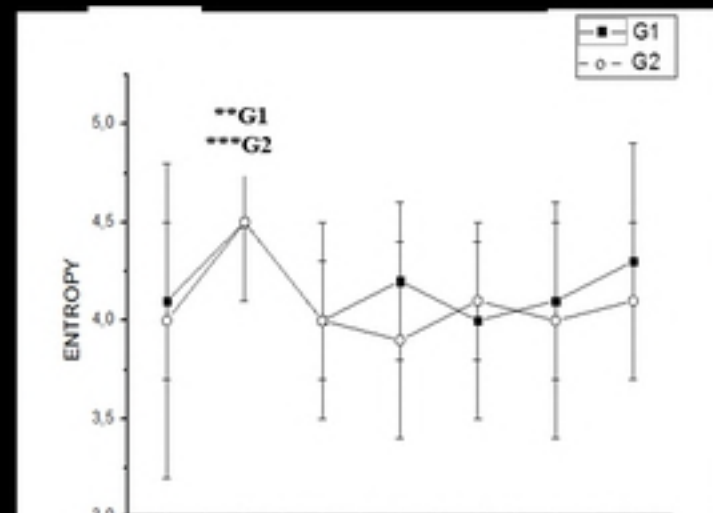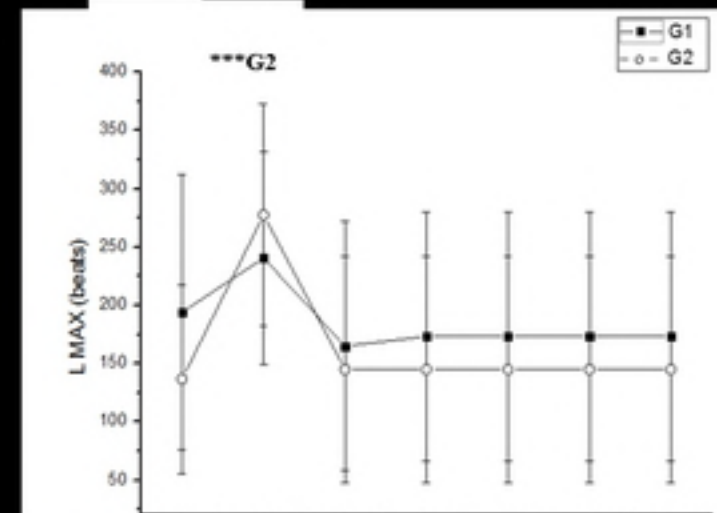

Figure 4
